# Supplementary material for: Accelerated phosphorous leaching during abrupt climate transitions in a temperate Atlantic ecosystem in Northwest Spain recorded by stalagmite P/Ca variations
Source: Copernicus journal article supplement (doi:10.5194/egusphere-2025-1000), 2025-05-07
Supplement: Supplementary file 1 [file egusphere-2025-1000-supplement.pdf]

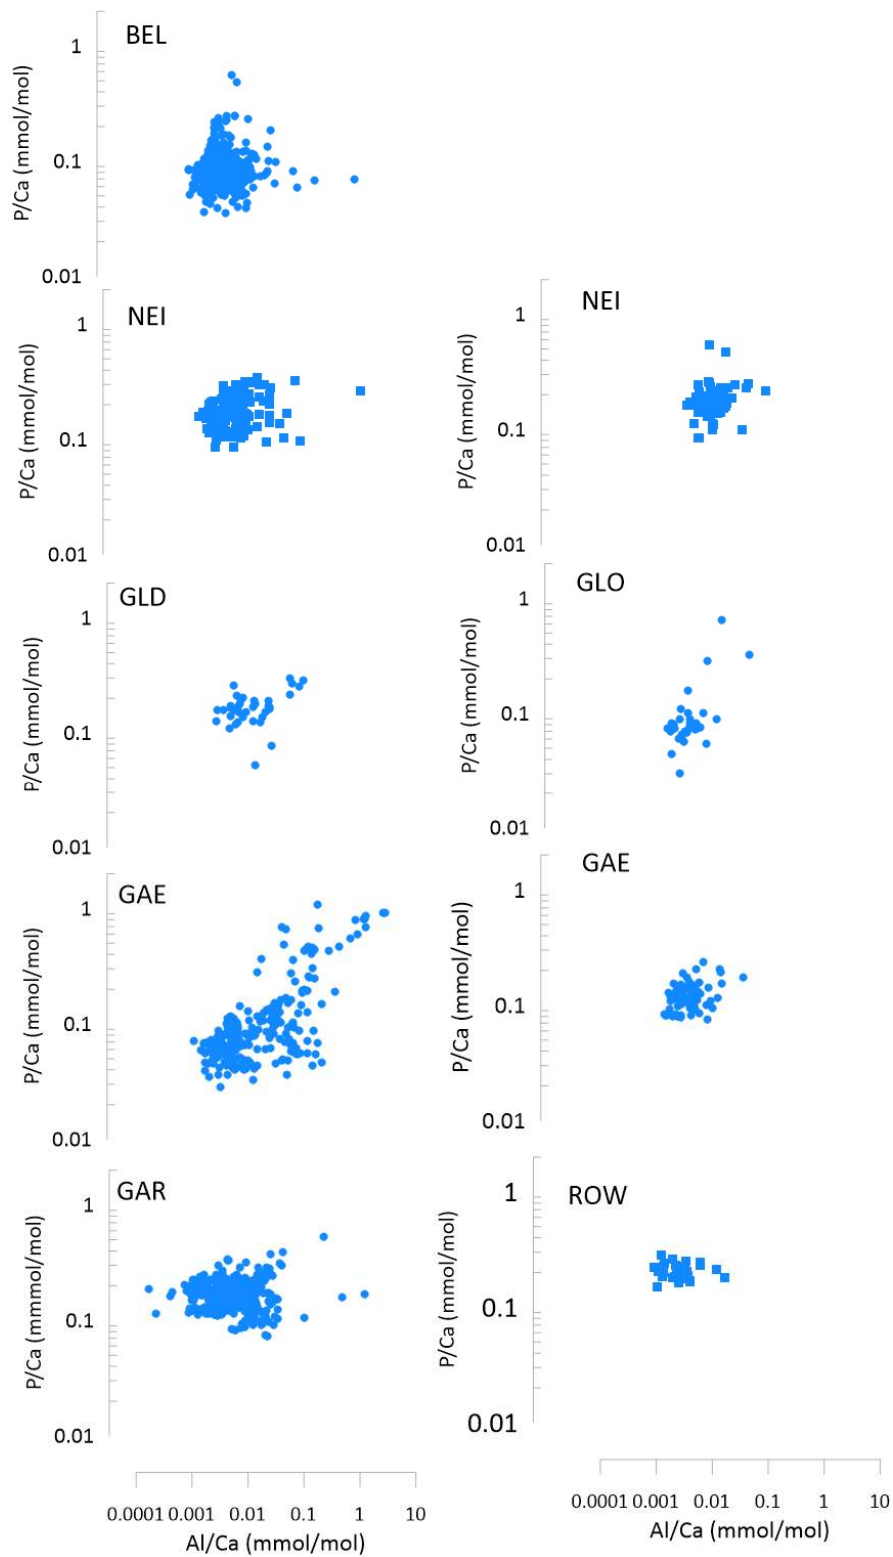

Figure S1. For each evaluated stalagmite, the measured P/Ca ratio vs Al/Ca ratio (mmol/mol). Left column shows results for PGM-LIG, and right column for GS 22.

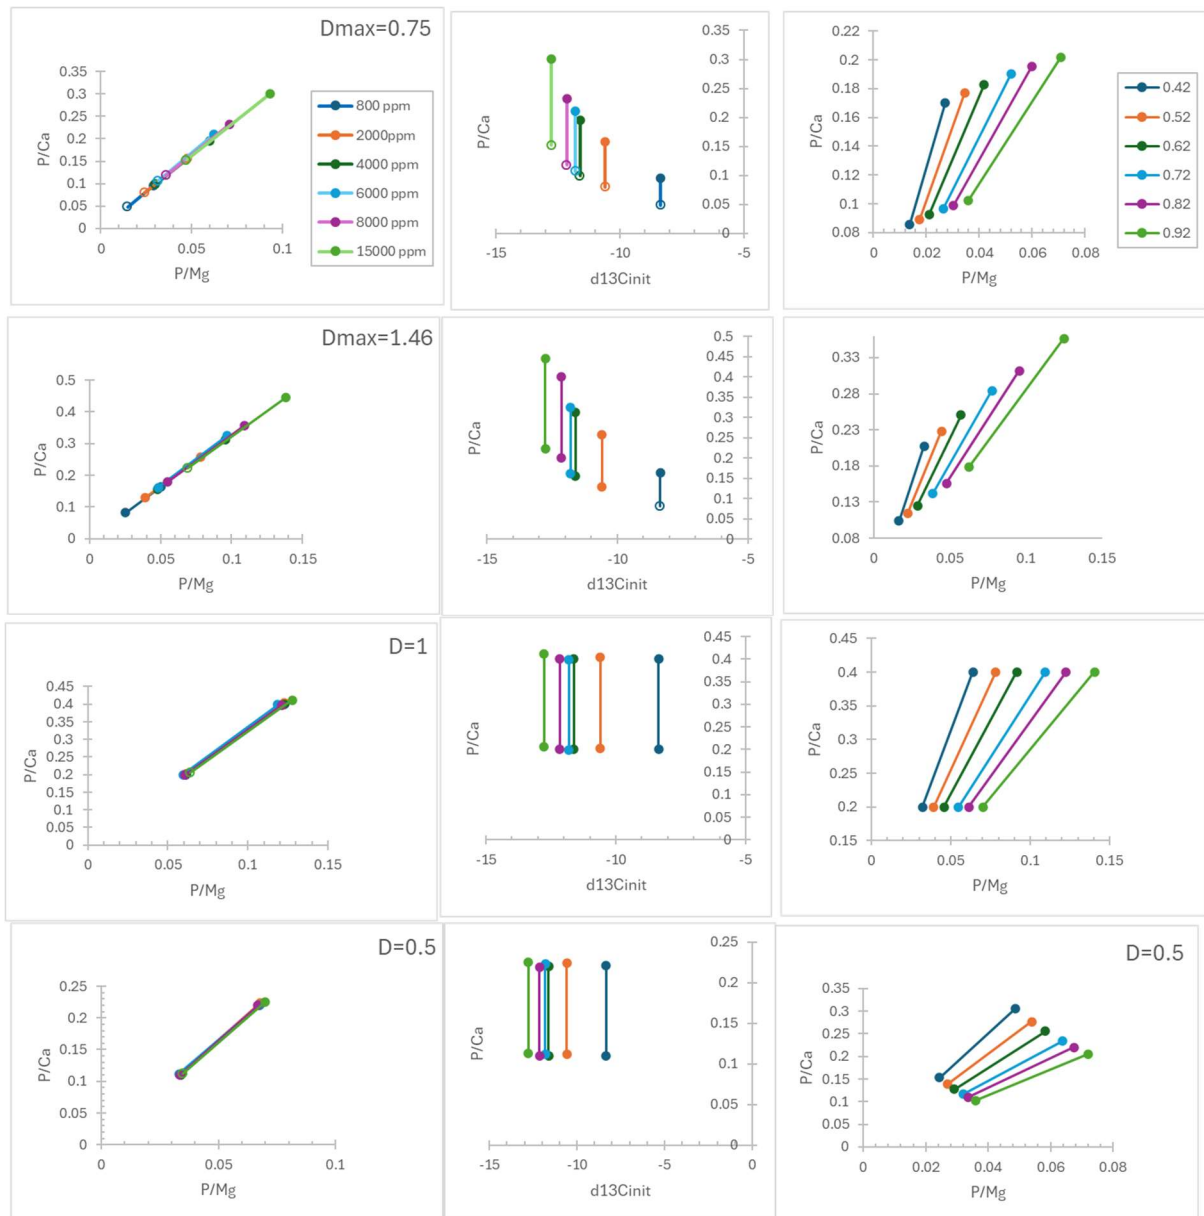

Figure S2. Illustration of stalagmite chemistry predicted from simulations shown in Figure 7, but comparing the effect of two ratios of initial dripwater P/Ca, 0.2 and 0.4 mmol/mol. The left two columns illustrate results for a constant fCa of 0.75 but varying initial soil pCO<sub>2</sub> and solid lines connect simulations of identical soil pCO<sub>2</sub> but different initial dripwater P/Ca. The rightmost column illustrates results for a constant soil pCO<sub>2</sub> of 4000 ppm but varying fCa, and solid lines connect simulations of identical fCa but different initial dripwater P/Ca. The  $\delta^{13}\text{C}_{\text{init}}$  is estimated from CaveCalc simulations as described in the text.

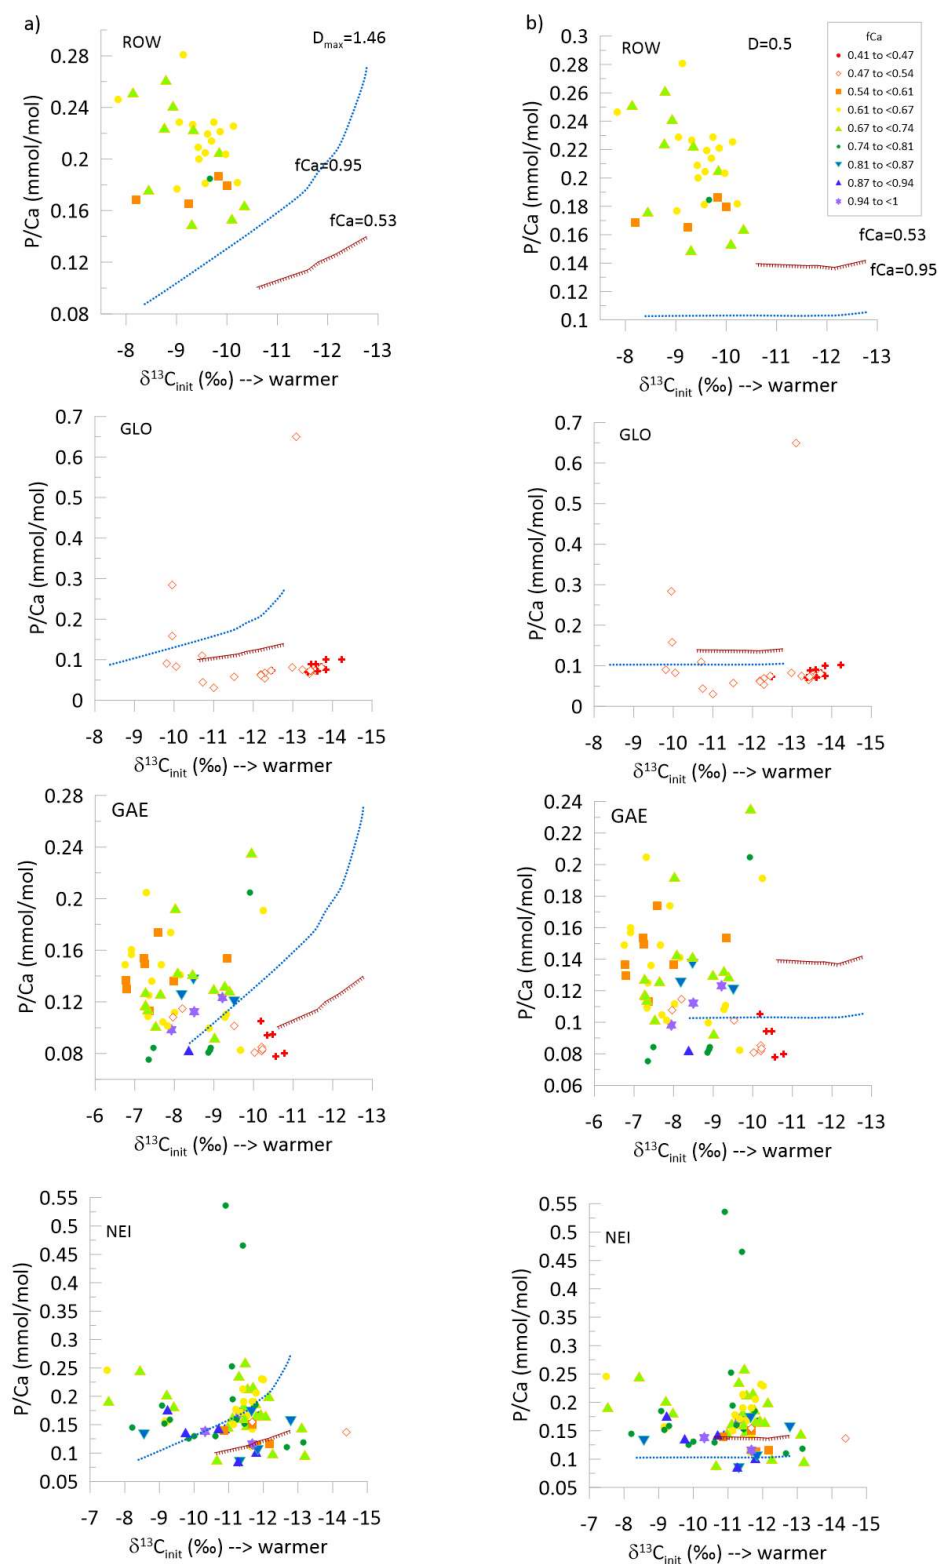

Figure S3. For the stalagmites covering the GS22 period, the P/Ca vs  $\delta^{13}\text{C}_{\text{init}}$ , with symbols indicating the fCa. Lines illustrate additionally the modeled variation of P/Ca with  $\delta^{13}\text{C}_{\text{init}}$  for a dripwater of constant initial P/Ca (0.2 mmol/mol) for the case of fCa 0.95 and 0.52. Panel a) illustrates the results of model A where  $D_{\text{max}}=1.46$  and panel b) illustrates the results of model C where  $D=0.5$ .

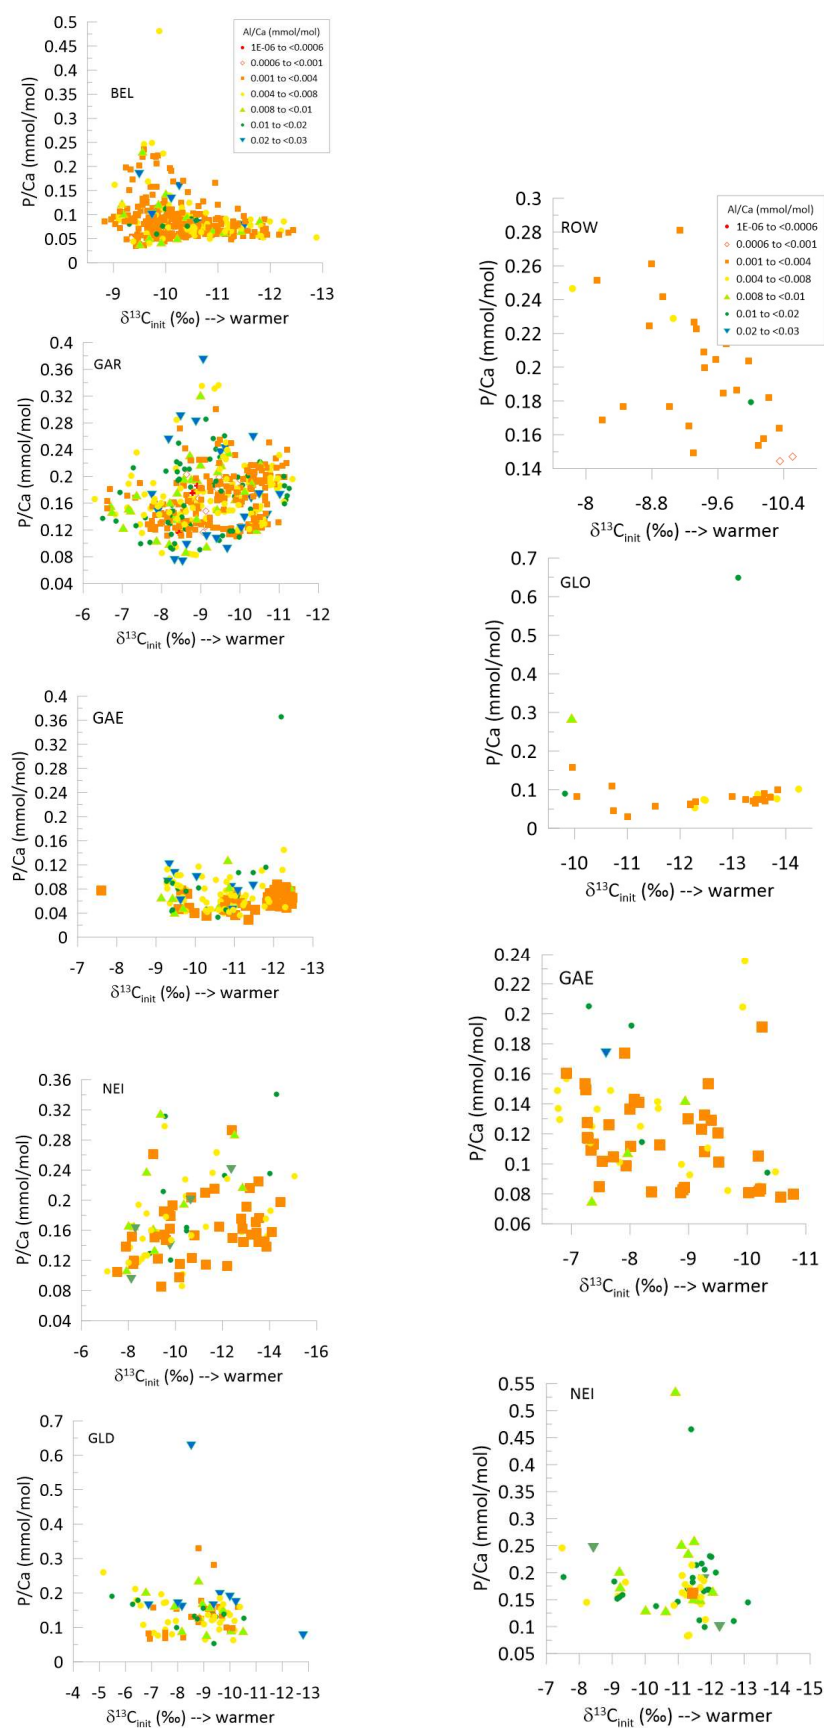

Figure S4. For each evaluated stalagmite, the measured P/Ca ratio vs variation in fCa , symbols coded with the measured Al/Ca ratio.

**Table S1: Input parameters used in in the CAVECALC simulations.**

| soil Gas<br>pCO <sub>2</sub> | Cave air<br>pCO <sub>2</sub> | Temperature<br>C | gas<br>volume<br>L |
|------------------------------|------------------------------|------------------|--------------------|
| 15000                        | 550                          | 13               | 150                |
| 8000                         | 550                          | 13               | 150                |
| 4000                         | 300                          | 9                | 150                |
| 2000                         | 300                          | 5                | 150                |
| 800                          | 300                          | 5                | 150                |
